# Supplementary material for: A Bayesian framework to estimate diversification rates and their variation through time and space
Source: BMC Evol Biol. 2011 Oct 21;11:311. doi: 10.1186/1471-2148-11-311 (PMC3224121; doi:10.1186/1471-2148-11-311)
Supplement: Additional file 1 — Marginal Likelihoods for different models of diversification. Marginal Likelihoods for simulated data sets calculated under birth-death (BD), pure-birth (PB), and pure-birth with rate shift (PB2-PB4) models based on thermodynamic integration. [file 1471-2148-11-311-S1.XLS]

## Sheet: Table S1
Additional file 1 - Marginal Likelihoods for different models of diversification.
	Simulation settings			Marginal Likelihood (TDI)
no. of tips	λ	μ		lnLBD	lnLPB1	lnLPB2	lnLPB3	lnLPB4
50	0.5	0.05		48.1088	48.4616	48.0221
100	0.5	0.05		167.422	168.623	168.305
50	0.5	0.25		33.6188	32.3234	32.8653
100	0.5	0.25		138.412	136.582	138.517
50	0.5	0.45		1.30464	-11.1858	-0.482232
100	0.5	0.45		78.2566	59.915	75.7244
50	0.5	0		50.3282	50.8538	50.2656
100	0.5	0		173.197	174.656	174.313
100 (25%)	1	0		-146.145	-145.041
200 (50%)	1	0		-252.837	-250.787
300 (75%)	1	0		-332.736	-330.071
400	1	0		-391.715	-388.531
100 (25%)	1	0.9		-269.343	-287.667
200 (50%)	1	0.9		-443.852	-478
300 (75%)	1	0.9		-574.722	-623.81
400	1	0.9		-681.343	-747.128
50	0.1, 0.2	0		-19.5069	-20.6678	-19.8002	-20.6815
100	0.1, 0.2	0		22.9085	19.7418	23.1297	22.6908
50	0.05, 0.25	0		-46.2472	-55.7892	-43.9251	-44.5328
100	0.05, 0.25	0		13.9516	-7.6713	16.8443	16.4774
50	0.02, 0.16	0		-71.9051	-85.238	-64.9364	-65.2802
100	0.02, 0.16	0		-82.6282	-113.163	-67.8621	-68.3286
50	0.2, 0.1	0		-25.4414	-23.7011	-23.4314	-24.1642
100	0.2, 0.1	0		4.79014	7.7922	10.5767	9.81289
50	0.5, 0.1	0		10.3554	12.7052	21.9651	21.221
100	0.5, 0.1	0		59.8569	63.1875	88.9338	88.5293
50	0.16, 0.02	0		-57.9434	-55.7377	-45.9847	-46.4114
100	0.16, 0.02	0		-48.8092	-45.4165	-20.6498	-20.949
50	0.1, 0.2, 0.1	0		-33.1637	-32.313	-32.8019	-33.4409	-34.4626
100	0.1, 0.2, 0.1	0		-8.64285	-6.4099	-6.58062	-6.23563	-6.99358
50	0.1, 0.5, 0.1	0		-7.1426	-6.95442	-4.80467	-0.676605	-1.01316
100	0.1, 0.5, 0.1	0		87.8539	90.431	99.8057	110.541	110.593
50	0.02, 0.16, 0.02	0		-107.633	-107.209	-105.554	-96.4644	-95.9092
100	0.02, 0.16, 0.02	0		-149.339	-149.367	-144.699	-117.364	-116.707
Marginal Likelihoods for simulated data sets calculated under birth-death (BD), pure-birth (PB), and pure-birth with rate shift (PB2-PB4) models based on thermodynamic integration.
