# Supplementary material for: A Bayesian framework to estimate diversification rates and their variation through time and space
Source: BMC Evol Biol. 2011 Oct 21;11:311. doi: 10.1186/1471-2148-11-311 (PMC3224121; doi:10.1186/1471-2148-11-311)
Supplement: Additional file 2 — Posterior rate estimates. Parameter estimates, 95% credibility intervals and ESS values for all data sets simulated. All simulations settings are provided in Additional file 4. [file 1471-2148-11-311-S2.XLS]

## Sheet: Table S2
Additional file 2 - Posterior rate estimates.
BD	no. of simulation	1		2		3		4		5		6		7		8
	Summary Statistic	λ	μ	λ	μ	λ	μ	λ	μ	λ	μ	λ	μ	λ	μ	λ	μ
	mean	0.5689	0.2303	0.5487	0.1777	0.4859	0.2768	0.5171	0.2991	0.4883	0.4309	0.4891	0.435	0.4663	n/a	0.4806	n/a
	95% HPD lower	0.3007	5.6888e-06	0.3512	4.7399e-06	0.2377	2.4453e-06	0.2896	3.4414e-06	0.1957	0.083649	0.2654	0.1885	0.2965	n/a	0.3562	n/a
	95% HPD upper	0.9035	0.6281	0.7747	0.4705	0.8096	0.6464	0.7713	0.6064	0.8385	0.7984	0.7536	0.7144	0.6625	n/a	0.6137	n/a
	effective sample size (ESS)	240.461	303.976	265.31	258.937	291.593	301.695	233.951	250.307	258.032	257.776	198.604	212.466	219.052	n/a	174.912	n/a
PB	no. of simulation	7		8
	Summary Statistic	λ	μ	λ	μ
	mean	0.4663	n/a	0.4806	n/a
	95% HPD lower	0.2965	n/a	0.3562	n/a
	95% HPD upper	0.6625	n/a	0.6137	n/a
	effective sample size (ESS)	219.052	n/a	174.912	n/a
PB sampling	no. of simulation	9		10		11		12
	Summary Statistic	λ	μ	λ	μ	λ	μ	λ	μ
	mean	1.0877	n/a	1.0706	n/a	1.0602	n/a	1.0536	n/a
	95% HPD lower	0.8954	n/a	0.9153	n/a	0.91	n/a	0.9133	n/a
	95% HPD upper	1.2919	n/a	1.2378	n/a	1.2147	n/a	1.2013	n/a
	effective sample size (ESS)	211.065	n/a	241.123	n/a	234.926	n/a	223.538	n/a
BD sampling	no. of simulation	13		14		15		16
	Summary Statistic	λ	μ	λ	μ	λ	μ	λ	μ
	mean	0.9852	0.8208	1.0196	0.8544	1.0352	0.8766	1.0407	0.8915
	95% HPD lower	0.5066	0.2874	0.685	0.4825	0.7494	0.5664	0.8123	0.6313
	95% HPD upper	1.4917	1.379	1.3731	1.2508	1.3252	1.2103	1.2884	1.1686
	effective sample size (ESS)	250.3	245.189	202.265	190.734	197.687	222.044	191.015	178.808
PB2	no. of simulation	17		18		19		20		21		22		23		24		25		26		27		28
	Summary Statistic	λ_1	λ_2	λ_1	λ_2	λ_1	λ_2	λ_1	λ_2	λ_1	λ_2	λ_1	λ_2	λ_1	λ_2	λ_1	λ_2	λ_1	λ_2	λ_1	λ_2	λ_1	λ_2	λ_1	λ_2
	mean	0.2446	0.1121	0.2238	0.097997	0.2603	0.050548	0.2555	0.053503	0.1715	0.021353	0.1638	0.020383	0.1173	0.1929	0.1055	0.2089	0.1115	0.4973	0.1039	0.511	0.026236	0.1643	0.023737	0.163
	95% HPD lower	0.070677	0.03131	0.1158	0.048145	0.1017	0.021979	0.1678	0.026679	0.078765	0.0093869	0.1063	0.011971	0.039885	0.085036	0.05836	0.1007	0.033348	0.2181	0.060798	0.3187	0.00041648	0.098611	0.0042756	0.1167
	95% HPD upper	0.3543	0.1998	0.2847	0.1621	0.4272	0.08424	0.3462	0.084457	0.2728	0.036187	0.2263	0.029135	0.1907	0.3372	0.1553	0.3299	0.2012	0.7928	0.1487	0.7239	0.056986	0.2351	0.04486	0.2109
	effective sample size (ESS)	964.801	291.61	347.712	294.54	371.77	232.707	162.226	221.956	156.838	216.559	258.817	237.17	167.715	165.09	214.032	284.073	178.666	205.028	216.831	180.856	218.137	248.023	161.018	222.009
PB3	no. of simulation	29			30			31			32			33			34
	Summary Statistic	λ_1	λ_2	λ_3	λ_1	λ_2	λ_3	λ_1	λ_2	λ_3	λ_1	λ_2	λ_3	λ_1	λ_2	λ_3	λ_1	λ_2	λ_3
	mean	0.1217	0.1874	0.1224	0.1081	0.1884	0.099854	0.1206	0.3192	0.1072	0.1103	0.499	0.118	0.028252	0.1522	0.026814	0.022059	0.1586	0.020843
	95% HPD lower	0.034767	0.010211	0.021329	0.053605	0.042537	0.021327	0.020616	0.034498	0.033773	0.03879	0.2927	0.021025	0.0067742	0.016771	0.0067878	0.010101	0.025097	0.010762
	95% HPD upper	0.2078	0.2529	0.236	0.1634	0.1764	0.1875	0.2356	0.7246	0.1976	0.1879	0.7223	0.2558	0.042732	0.288	0.04184	0.036558	0.2427	0.03272
	effective sample size (ESS)	198.344	560.911	322.841	146.142	675.444	587.927	267.325	280.298	295.443	192.373	195.769	220.305	193.684	195.759	184.947	259.938	245.089	199.893
SPVAR	no. of simulation	35			36			37			38
	Summary Statistic	λ_0	μ	k	λ_0	μ	k	λ_0	μ	k	λ_0	μ	k
	mean	1.9094	0.4993	0.2288	1.6832	0.3382	0.1873	3.7192	0.3142	0.7529	5.2197	0.3334	0.9733
	95% HPD lower	0.4858	0	0.0075016	0.5192	3.9014e-06	0.037898	1.3563	7.358e-06	0.4848	2.4101	3.3728e-06	0.6373
	95% HPD upper	3.7963	1.2396	0.4397	3.168	0.8579	0.3289	6.3389	0.8826	1.0424	8.2601	1.0757	1.3163
	effective sample size (ESS)	311.887	254.503	184.619	293.899	284.522	218.742	393.797	341.951	214.837	449.102	264.95	202.755
Parameter estimates, 95% credibility intervals and ESS values for all data sets simulated.
All simulations settings are provided in Additional file 4.
