# Supplementary material for: A Bayesian framework to estimate diversification rates and their variation through time and space
Source: BMC Evol Biol. 2011 Oct 21;11:311. doi: 10.1186/1471-2148-11-311 (PMC3224121; doi:10.1186/1471-2148-11-311)
Supplement: Additional file 3 — Effect of sequential estimation of divergence times and diversification rates. The potential impact of specifying priors on the birth-death parameters in both the molecular clock analysis and the subsequent rate estimation is assessed through generating a starting tree, simulating a molecular alignment on it, and run BEAST analyses on the alignment. The rate are then estimated on both the starting tree and the BEAST posterior trees, and compared. [file 1471-2148-11-311-S3.XLS]

## Sheet: Table S3
Additional file 3 - Effect of sequential estimation of divergence times and diversification rates.
rate estimates on the starting tree					rate estimates (with rel. err.) on the successive BEAST trees
λ	μ	r	a		λ	μ	r	a
0.9437	0.2754	0.6683	0.2708		0.9424	0.2749	0.6675	0.269 (-0.01)
0.3601	0.1457	0.2144	0.3728		0.354 (-0.02)	0.1459	0.209 (-0.03)	0.378 (0.01)
0.9959	0.8759	0.12	0.8649		1.008 (0.01)	0.888 (0.01)	0.1196	0.8657
The potential impact of specifying priors on the birth-death parameters in both the molecular clock analysis and the subsequent rate estimation is assessed
through generating a starting tree, simulating a molecular alignment on it, and run BEAST analyses on the alignment.
The rate are then estimated on both the starting tree and the BEAST posterior trees, and compared.
