# Supplementary material for: A Bayesian framework to estimate diversification rates and their variation through time and space
Source: BMC Evol Biol. 2011 Oct 21;11:311. doi: 10.1186/1471-2148-11-311 (PMC3224121; doi:10.1186/1471-2148-11-311)
Supplement: Additional file 4 — List of the simulation settings. Simulations were obtained from birth-death (BD), pure-birth (PB), pure-birth with rate shift (PB2-PB4), and (approximately) continuously decreasing speciation rates (SPVAR). The parameters included are speciation rates (λ), extinction rate (μ), time of rate shift (s), sampling fraction (ρ), and the shape parameter of the exponential transformation of λ through time (k). The continuously decreasing rates (SPVAR model) were approximated by imposing nine equally spaced rate shifts where speciation rates follow an exponential decrease. The value of λ reported for the SPVAR model represents the initial speciation rate (λ0). [file 1471-2148-11-311-S4.XLS]

## Sheet: Table S4
Additional file 4 - List of the simulation settings.
			Simulation settings
no. simulation	no. of tips	model	λ	μ	s	ρ	k
1	50	BD	0.5	0.05
2	100	BD	0.5	0.05
3	50	BD	0.5	0.25
4	100	BD	0.5	0.25
5	50	BD	0.5	0.45
6	100	BD	0.5	0.45
7	50	PB	0.5	0
8	100	PB	0.5	0
9	100 (25%)	PB sampling	1	0		0.25
10	200 (50%)	PB sampling	1	0		0.5
11	300 (75%)	PB sampling	1	0		0.75
12	400	PB sampling	1	0		1
13	100 (25%)	BD sampling	1	0.9		0.25
14	200 (50%)	BD sampling	1	0.9		0.5
15	300 (75%)	BD sampling	1	0.9		0.75
16	400	BD sampling	1	0.9		1
17	50	PB2	0.1, 0.2	0	5
18	100	PB2	0.1, 0.2	0	5
19	50	PB2	0.05, 0.25	0	3.5
20	100	PB2	0.05, 0.25	0	5
21	50	PB2	0.02, 0.16	0	5
22	100	PB2	0.02, 0.16	0	5
23	50	PB2	0.2, 0.1	0	5
24	100	PB2	0.2, 0.1	0	7
25	50	PB2	0.5, 0.1	0	3
26	100	PB2	0.5, 0.1	0	5
27	50	PB2	0.16, 0.02	0	5
28	100	PB2	0.16, 0.02	0	5
29	50	PB3	0.1, 0.2, 0.1	0	3, 7
30	100	PB3	0.1, 0.2, 0.1	0	5, 10
31	50	PB3	0.1, 0.5, 0.1	0	2, 4
32	100	PB3	0.1, 0.5, 0.1	0	2, 6
33	50	PB3	0.02, 0.16, 0.02	0	15, 20
34	100	PB3	0.02, 0.16, 0.02	0	15, 20
35	50	SPVAR	1	0.1			0.25
36	100	SPVAR	1	0.1			0.25
37	50	SPVAR	5	0			0.95
38	100	SPVAR	5	0			0.95
Simulations were obtained from birth-death (BD), pure-birth (PB), pure-birth with rate shift (PB2-PB4), and (approximately) continuously decreasing speciation rates (SPVAR).
The parameters included are speciation rates (λ), extinction rate (μ), time of rate shift (s), sampling fraction (ρ), shape parameter of the exponential transformation of λ through time (k).
The continuously decreasing rates (SPVAR model) were approximated by imposing nine equally spaced rate shifts where speciation rates follow an exponential decrease.
The value of λ reported for the SPVAR model represents the initial speciation rate (λ0).
